# Supplementary material for: Exopolysaccharides from vaginal lactobacilli modulate microbial biofilms
Source: Springer Nature journal article supplement (doi:10.1186/s12934-023-02053-x), 2023-03-08
Supplement: MOESM1 [file 12934_2023_2053_MOESM1_ESM.pdf]

# Exopolysaccharides from vaginal lactobacilli modulate microbial biofilms

Barbara Giordani<sup>1</sup>, Marina Naldi<sup>1</sup>, Vanessa Croatti<sup>1</sup>, Carola Parolin<sup>1</sup>, Ülfet Erdoğan<sup>2</sup>, Manuela Bartolini<sup>1</sup>, Beatrice Vitali<sup>1\*</sup>

<sup>1</sup> Department of Pharmacy and Biotechnology, University of Bologna, Bologna, Italy

<sup>2</sup> Yeditepe University, Istanbul, Turkey

\* Corresponding to: b.vitali@unibo.it

## Additional file

### Index

|                                                                                                                                                                                                                                                                                                                                                                                        |           |
|----------------------------------------------------------------------------------------------------------------------------------------------------------------------------------------------------------------------------------------------------------------------------------------------------------------------------------------------------------------------------------------|-----------|
| <b>Table S1:</b> Retention time, regression analysis, and LOD for the PMP-monosaccharides found in EPS.....                                                                                                                                                                                                                                                                            | <b>p2</b> |
| <b>Figure S1:</b> Representative chromatographic analysis of (A) derivatized monosaccharides released upon hydrolysis of EPS-BC5, and (B) mixture of eight standard PMP-monosaccharides. Peaks: 1: D-mannose; 2: D-glucosamine; 3: D-rhamnose; 4: D-galactosamine; 5: D-glucose; 6: D-galactose; 7: D-xylose; 8: D- fucose. Exceeding PMP elutes with the shortest retention time..... | <b>p3</b> |
| <b>Fig. S2</b> Representative LC-MS chromatogram of PMP-monosaccharides released upon hydrolysis of EPS-BC5. The peak identification was achieved on the basis of analyte retention time, molecular weight of the parent ions, and fragment ions (Unifi Software).....                                                                                                                 | <b>p4</b> |
| <b>Fig. S3</b> Effects of (A) EPS-BC1, (B) EPS-BC4, (C) EPS-BC5, (D) EPS-BC9, (E) EPS-BC12 and (F) EPS-BC14 at three concentrations (0.1, 0.5, 1 mg/mL) on the biofilms of lactobacilli, evaluated through CV staining. The results are expressed in percentage with respect to control (100%, red line) (mean $\pm$ SD, $n = 3$ ). * $p < 0.05$ .....                                 | <b>p5</b> |
| <b>Fig. S4</b> Effects of (A) EPS-BC1, (B) EPS-BC4, (C) EPS-BC5, (D) EPS-BC9, (E) EPS-BC12 and (F) EPS-BC14 at three concentrations (0.1, 0.5, 1 mg/mL) on the biofilms of lactobacilli, evaluated through MTT assay. The results are expressed in percentage with respect to control (100%, red line) (mean $\pm$ SD, $n = 3$ ). * $p < 0.05$ .....                                   | <b>p6</b> |
| <b>Fig. S5</b> Effects of (A) EPS-BC1, (B) EPS-BC4, (C) EPS-BC5, (D) EPS-BC9, (E) EPS-BC12 and (F) EPS-BC14 at three concentrations (0.1, 0.5, 1 mg/mL) on the biofilms of pathogens, evaluated through CV staining. The results are expressed in percentage with respect to control (100%, red line) (mean $\pm$ SD, $n = 3$ ). * $p < 0.05$ .....                                    | <b>p7</b> |
| <b>Fig. S6</b> Effects of (A) EPS-BC1, (B) EPS-BC4, (C) EPS-BC5, (D) EPS-BC9, (E) EPS-BC12 and (F) EPS-BC14 at three concentrations (0.1, 0.5, 1 mg/mL) on the biofilms of pathogens, evaluated through MTT assay. The results are expressed in percentage with respect to control (100%, red line) (mean $\pm$ SD, $n = 3$ ). * $p < 0.05$ .....                                      | <b>p8</b> |
| <b>Fig. S7</b> Correlation graphics between results collected through CV staining and MTT assay towards biofilms of lactobacilli (A) and pathogens (B). Data obtained testing EPS (EPS-BC1, EPS-BC4, EPS-BC5, EPS-BC9, EPS-BC12 and EPS-BC14) at three concentrations (0.1, 0.5 and 1 mg/mL) are included in the analyses.....                                                         | <b>p9</b> |

**Table S1** Retention time, regression analysis, and LOD for the PMP-monosaccharides found in EPS.

| Monosaccharide  | Retention time (min) | Linearity range ( $\mu\text{M}$ ) | Regression equation, $y = mx + q$ |       | Correlation coefficient | Limit of quantification (LOQ) ( $\mu\text{M}$ ) |
|-----------------|----------------------|-----------------------------------|-----------------------------------|-------|-------------------------|-------------------------------------------------|
|                 |                      |                                   | m                                 | q     |                         |                                                 |
|                 |                      |                                   | D-mannose                         | 9.8   |                         |                                                 |
| D-glucosamine   | 11.4                 | 0.20-50                           | 19487                             | -1604 | 0.9999                  | 0.10                                            |
| D-rhamnose      | 13.4                 | 0.39-25                           | 18047                             | -1347 | 0.9997                  | 0.34                                            |
| D-galactosamine | 16.4                 | 0.20-50                           | 23338                             | -388  | 0.9997                  | 0.15                                            |
| D-glucose       | 22.3                 | 0.20-50                           | 14146                             | -1587 | 0.9996                  | 0.15                                            |
| D-galactose     | 23.4                 | 0.20-25                           | 13045                             | -461  | 0.9994                  | 0.18                                            |
| D-xylose        | 25.1                 | 0.098-50                          | 15293                             | 981   | 0.9994                  | 0.064                                           |
| D-fucose        | 27.2                 | 0.39-25                           | 13834                             | -732  | 0.9991                  | 0.20                                            |

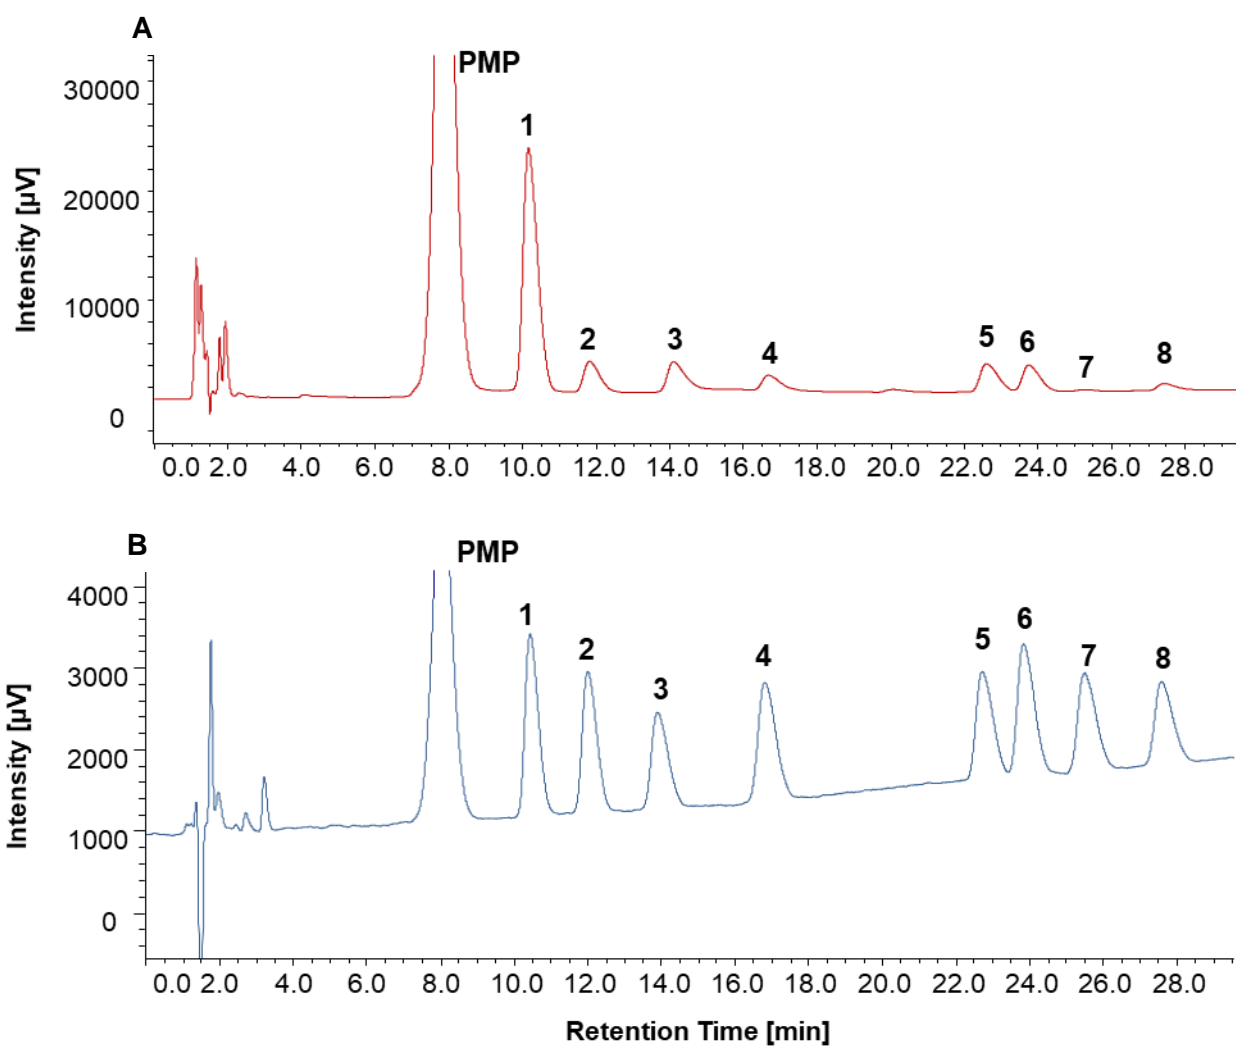

**Fig. S1** Representative chromatographic analysis of (A) derivatized monosaccharides released upon hydrolysis of EPS-BC5, and (B) mixture of eight standard PMP-monosaccharides. Peaks: 1: D-mannose; 2: D-glucosamine; 3: D-rhamnose; 4: D-galactosamine; 5: D-glucose; 6: D-galactose; 7: D-xylose; 8: D-fucose. Exceeding PMP elutes with the shortest retention time.

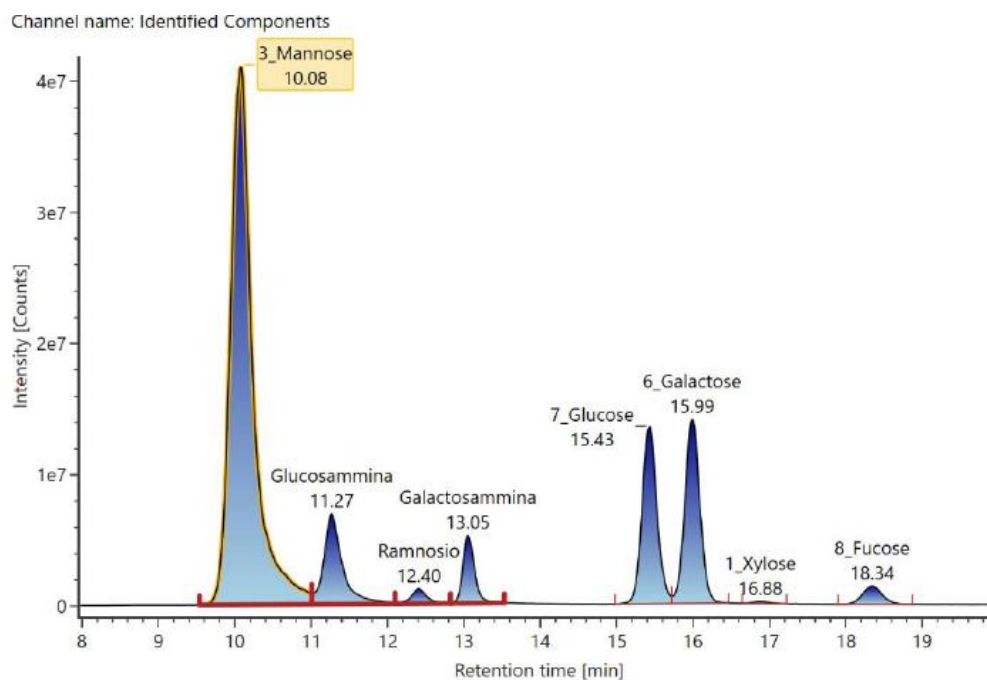

**Fig. S2** Representative LC-MS chromatogram of PMP-monosaccharides released upon hydrolysis of EPS-BC5. The peak identification was achieved on the basis of analyte retention time, molecular weight of the parent ions, and fragment ions (Unifi Software).

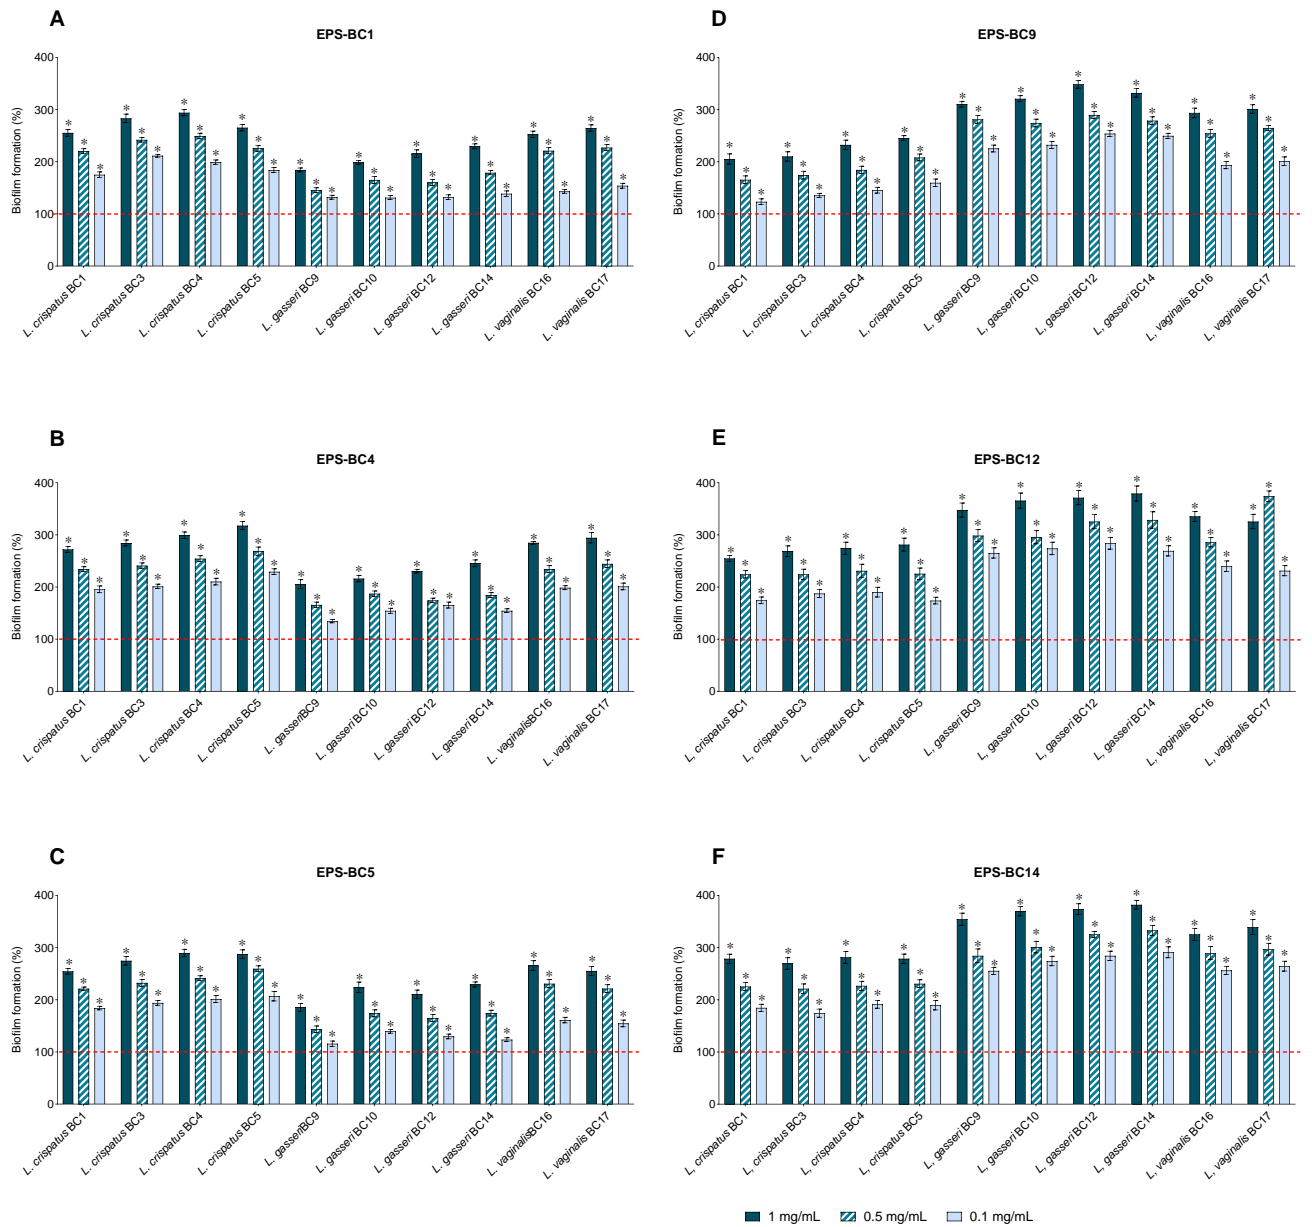

**Fig. S3** Effects of (A) EPS-BC1, (B) EPS-BC4, (C) EPS-BC5, (D) EPS-BC9, (E) EPS-BC12 and (F) EPS-BC14 at three concentrations (0.1, 0.5, 1 mg/mL) on the biofilms of lactobacilli, evaluated through CV staining. The results are expressed in percentage with respect to control (100%, red line) (mean  $\pm$  SD,  $n = 3$ ). \*  $p < 0.05$ .

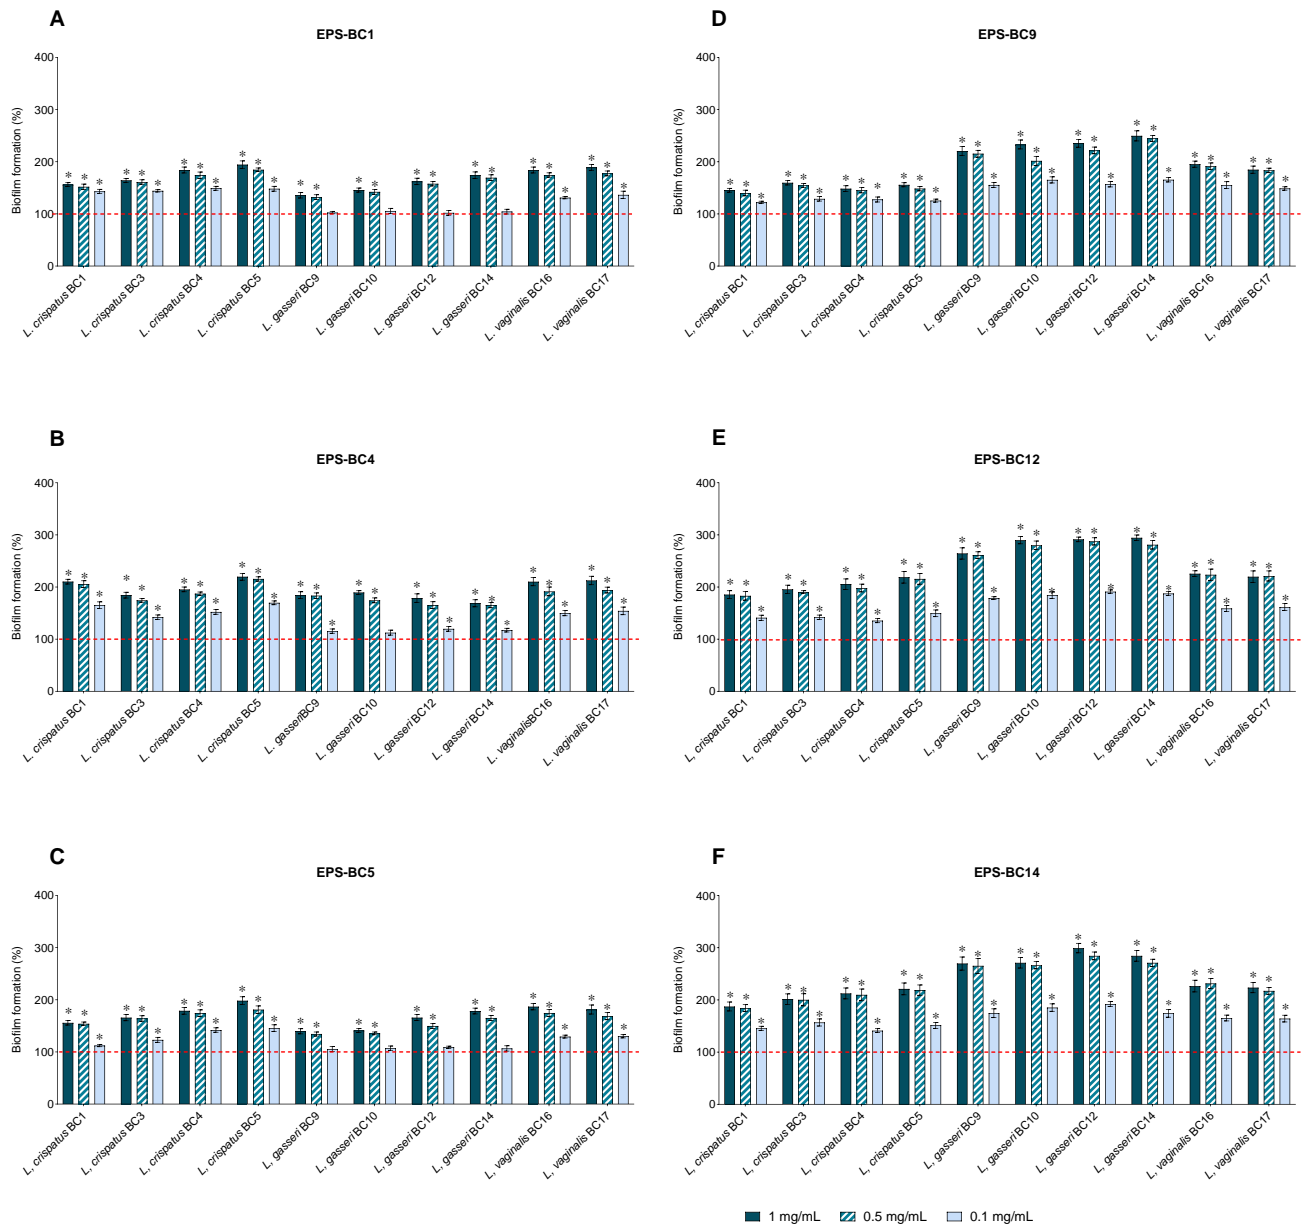

**Fig. S4** Effects of (A) EPS-BC1, (B) EPS-BC4, (C) EPS-BC5, (D) EPS-BC9, (E) EPS-BC12 and (F) EPS-BC14 at three concentrations (0.1, 0.5, 1 mg/mL) on the biofilms of lactobacilli, evaluated through MTT assay. The results are expressed in percentage with respect to control (100%, red line) (mean  $\pm$  SD,  $n = 3$ ). \*  $p < 0.05$ .

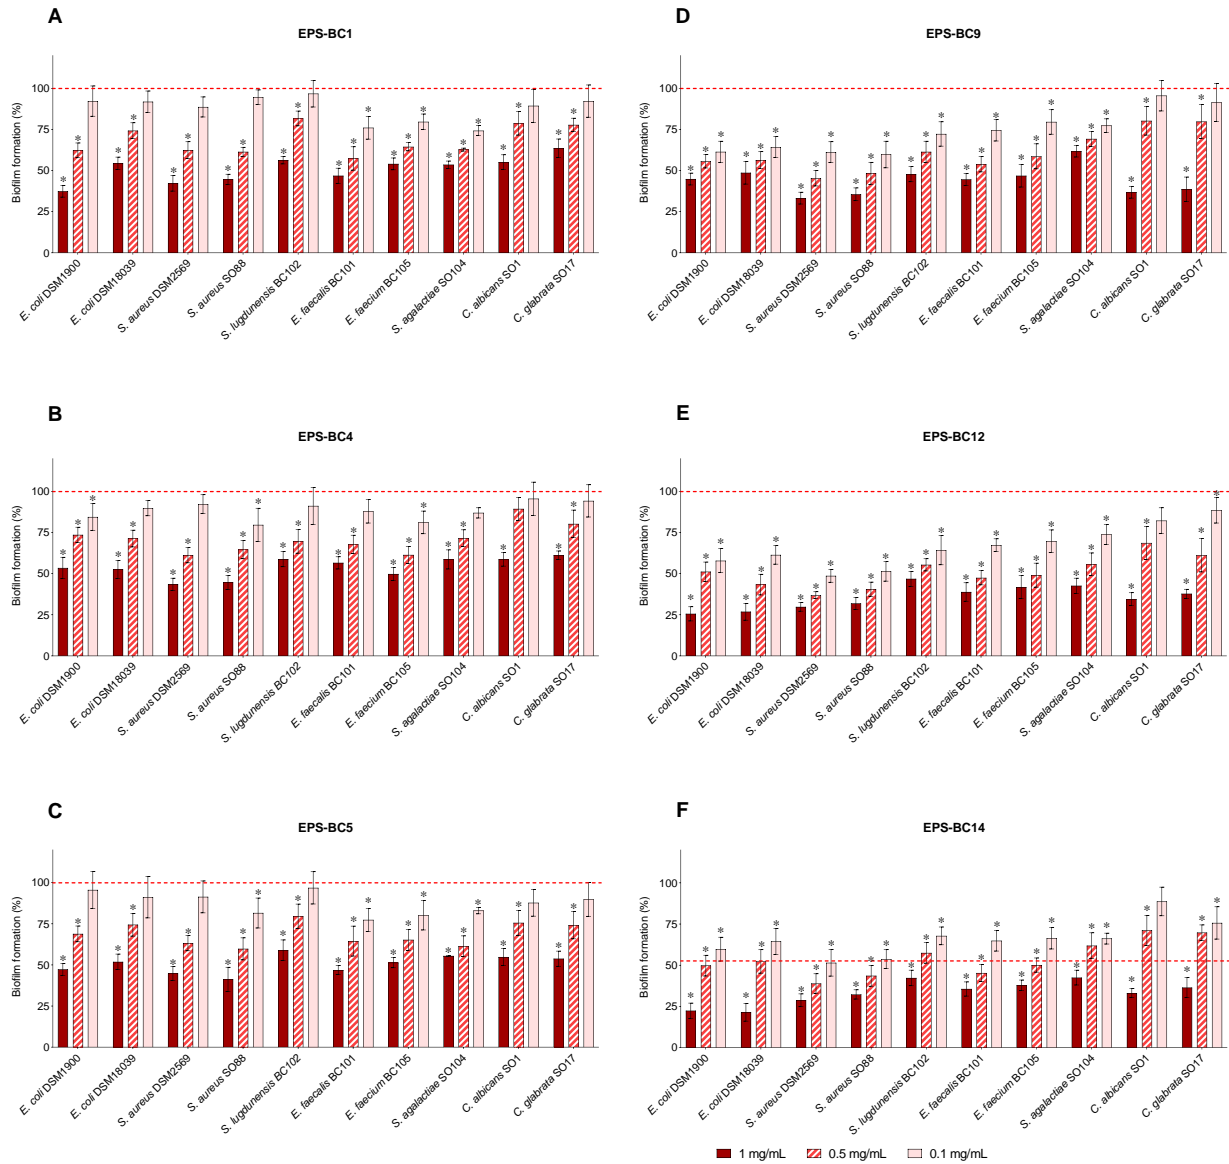

**Fig. S5** Effects of (A) EPS-BC1, (B) EPS-BC4, (C) EPS-BC5, (D) EPS-BC9, (E) EPS-BC12 and (F) EPS-BC14 at three concentrations (0.1, 0.5, 1 mg/mL) on the biofilms of pathogens, evaluated through CV staining. The results are expressed in percentage with respect to control (100%, red line) (mean  $\pm$  SD,  $n = 3$ ). \*  $p < 0.05$ .

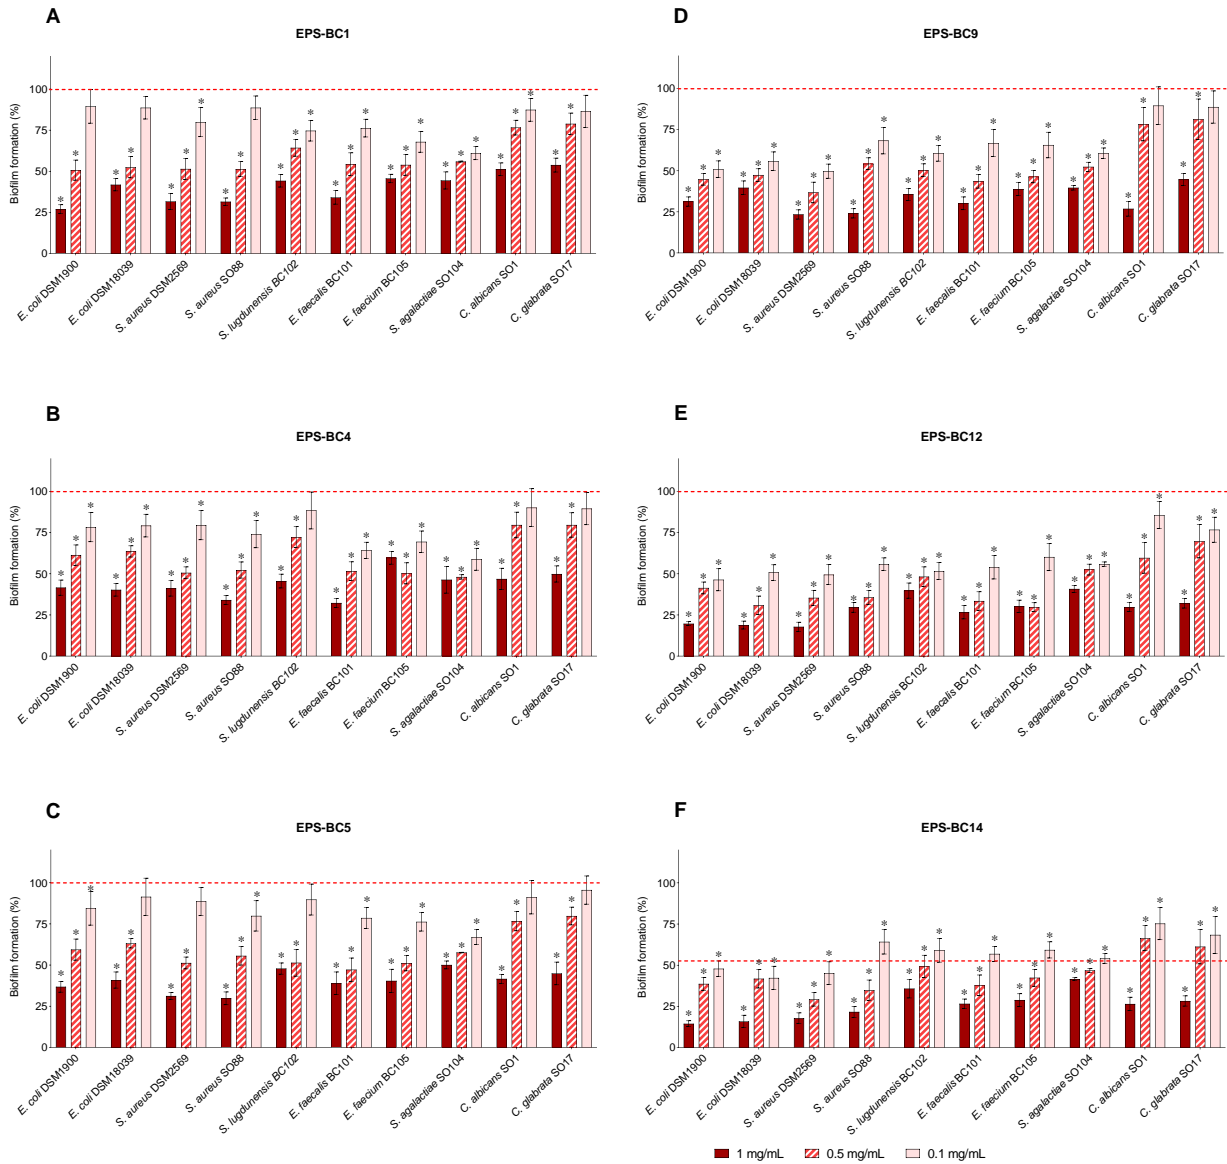

**Fig. S6** Effects of (A) EPS-BC1, (B) EPS-BC4, (C) EPS-BC5, (D) EPS-BC9, (E) EPS-BC12 and (F) EPS-BC14 at three concentrations (0.1, 0.5, 1 mg/mL) on the biofilms of pathogens, evaluated through MTT assay. The results are expressed in percentage with respect to control (100%, red line) (mean  $\pm$  SD,  $n = 3$ ). \*  $p < 0.05$ .



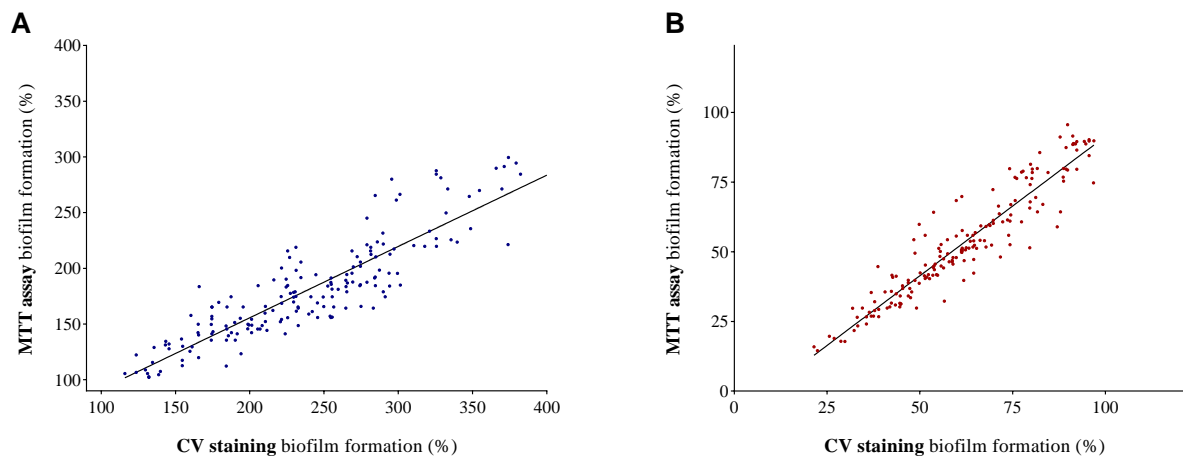

**Fig. S7** Correlation graphics between results collected through CV staining and MTT assay towards biofilms of lactobacilli (**A**) and pathogens (**B**). Data obtained testing EPS (EPS-BC1, EPS-BC4, EPS-BC5, EPS-BC9, EPS-BC12 and EPS-BC14) at three concentrations (0.1, 0.5 and 1 mg/mL) are included in the analyses.
